# ***Acinetobacter baumannii* and cefiderocol between *cidality* and adaptability**

*A. baumannii* in vitro response to cefiderocol

Stefano Stracquadanio<sup>1</sup>, Carmelo Bonomo<sup>1</sup>, Andrea Marino<sup>2</sup>, Dafne Bongiorno<sup>1</sup>, Grete Francesca Privitera<sup>3</sup>, Dalida Angela Bivona<sup>1</sup>, Alessia Mirabile<sup>1</sup>, Paolo Giuseppe Bonacci<sup>1</sup>, Stefania Stefani<sup>1#</sup>

<sup>1</sup> Biomedical and Biotechnological Sciences Department - University of Catania, Catania (Italy).

[s.stracquadanio@unict.it](mailto:s.stracquadanio@unict.it); [carmelo.bonomo@phd.unict.it](mailto:carmelo.bonomo@phd.unict.it); [dbongio@unict.it](mailto:dbongio@unict.it);

[dalidabivona@gmail.com](mailto:dalidabivona@gmail.com); [alessiamirabile93@gmail.com](mailto:alessiamirabile93@gmail.com); [paolo.bonacci@unict.it](mailto:paolo.bonacci@unict.it);

[stefania.stefani@unict.it](mailto:stefania.stefani@unict.it)

<sup>2</sup> Department of Clinical and Experimental Medicine - University of Catania, Catania (Italy).

[andreamarino9103@gmail.com](mailto:andreamarino9103@gmail.com)

<sup>3</sup> Department of Clinical and Experimental Medicine, Bioinformatics Unit - University of Catania,

Catania (Italy). [greteprivitera@libero.it](mailto:greteprivitera@libero.it)

#Corresponding author [stefania.stefani@unict.it](mailto:stefania.stefani@unict.it)

## **ABSTRACT**

Among the bacterial species included in the ESKAPE group, *Acinetobacter baumannii* is of great interest due to its intrinsic and acquired resistance to many antibiotic classes and its ability to infect different body districts. Cefiderocol is a novel cephalosporin active against Gram-negative bacteria with promising efficacy on *A. baumannii* infections, but some studies have reported therapeutic failures even in the presence of susceptible *A. baumannii* strains.

This study aims to investigate the interactions between cefiderocol and ten *A. baumannii* strains with different susceptibility profiles to this drug. We confirmed diverse susceptibility profiles in the strains, with resistance values close to the EUCAST-proposed breakpoints. MBC/MIC (minimal bactericidal concentration/minimal inhibitory concentration) ratios, demonstrated

26 bactericidal activity of the drug; on the other hand, bacterial regrowth was evident after exposition to  
27 cefiderocol, as were changes in the shape of colonies and bacterial cells. A switch to a non-susceptible  
28 phenotype in the presence of high cefiderocol concentrations was found as adaptation mechanisms  
29 implemented by these *A. baumannii* strains to overcome the *cidal* activity of this antibiotic, also  
30 confirmed by the presence of heteroresistant, unstable subpopulations. As our isolates harbored  
31 numerous  $\beta$ -lactamase genes,  $\beta$ -lactamase inhibitors showed the ability to restore the antimicrobial  
32 activity of cefiderocol regardless of the different non-susceptibility levels of the tested strains.

33           These in vitro results, can sustain the concept of using combination therapy to eliminate drug-  
34 adapted subpopulations and regain full cefiderocol activity in this difficult-to-treat species.

35

36 **Keywords:** *Acinetobacter baumannii*, cefiderocol, heteroresistance, AST, BLI

## 37 INTRODUCTION

38 *Acinetobacter baumannii* is a major clinical threat, both because of its established role as an  
39 important pathogen associated with nosocomial infections at various body sites and the challenge  
40 posed by the very limited treatment options available, due to its high intrinsic and acquired  
41 antimicrobial resistance. The latter entails, in many cases and for different antibiotics, characteristics  
42 of instability, related – as recently demonstrated - to frequent genomic rearrangements involving gene  
43 amplification, MGE acquisition, resistome and phage profiling changes [1,2].

44 The recent introduction of the novel siderophore-conjugated cephalosporin cefiderocol, whose  
45 spectrum includes *A. baumannii*, has raised great expectation in therapy [3]. The molecule is  
46 composed of a siderophore component that binds iron and uses active iron transport for drug entry  
47 into the bacterial periplasmic space. The cephalosporin moiety is the active antimicrobial component,  
48 structurally resembling a hybrid between ceftazidime and cefepime. Like other  $\beta$ -lactam agents, the  
49 main bactericidal activity of cefiderocol occurs through the inhibition of bacterial cell wall synthesis  
50 via binding of penicillin-binding proteins (PBPs) and inhibition of peptidoglycan synthesis, leading  
51 to cell death [4].

52 Several clinical studies have pointed out that this drug had similar efficacy to the best therapies  
53 available for infections caused by Gram-negative bacteria, but a higher rate of all-cause mortality has  
54 been described in the subset of *A. baumannii* infections [5], despite a minimal inhibitory  
55 concentration (MIC) of 4 mg/L. These authors indicated heteroresistance as a possible responsible  
56 for these failures [5,6], especially if bacteria are classified as susceptible by standard antibiotic  
57 susceptibility testing (AST) [1].

58 Heteroresistance is a poorly understood mechanism of survival in the presence of antibiotics  
59 and is defined as the presence of subpopulations with MIC values higher (variably defined as equal  
60 to or more than two- to eight-fold) than in the main population, i.e., a susceptible bacterial isolate  
61 could harbor a minority of resistant subpopulations. Despite the discovery of a high prevalence of

62 this mechanism in many different species, both Gram-positive and Gram-negative, with respect to  
63 many antibiotics [1], the majority of these subpopulations were considered unstable. Heteroresistance  
64 in *A. baumannii* was already described for different classes of antibiotics, including colistin,  
65 aminoglycosides, imipenem, meropenem, and tigecycline [7-10].

66 Due to the problem of reproducibility of broth microdilution (BMD) testing [11] as well as  
67 reported errors in disk diffusion [12], we performed some *cidality* tests and population analysis  
68 profiling (PAP) on a subset of isolates representative of the entire sample with the aim to determine  
69 the best *in vitro* conditions to test cefiderocol activity on *A. baumannii* strains with different degrees  
70 of susceptibility to this drug. Our results demonstrated that this species has a great potential for  
71 heteroresistance, despite an initial result of bactericidal activity of cefiderocol obtained from the  
72 evaluation of the MBC/MIC (minimal bactericidal concentration/minimal inhibitory concentration)  
73 ratio. Furthermore, these subpopulations, which in some cases are the result of antibiotic induction,  
74 were not stable at all, as they returned to the initial MIC after two passages in an antibiotic-free  
75 medium.

76 Interestingly, the addition of avibactam and sulbactam eliminates all subpopulations.

77

## 78 **MATERIAL AND METHODS**

### 79 **Bacterial strains and culture conditions**

80 Three laboratory-adapted and seven clinical MDR *A. baumannii* strains were selected for this  
81 study. Laboratory-adapted *A. baumannii* ATCC 19606 and ATCC 17978 were commercially  
82 obtained from the American Type Culture Collection (Manassas, VA) and *A. baumannii* ACICU was  
83 provided courtesy of Prof. Paolo Visca (Roma Tre University, Italy), while clinically significant  
84 strains were recently isolated from bronchial aspirates of cefiderocol (FDC)-naïve hospitalized  
85 patients, and FDC testing was requested by the infectious disease specialist. The clinical isolates were  
86 identified as *A. baumannii* by Matrix-Assisted Laser Desorption Ionization–Time of Flight (MALDI-  
87 TOF) mass spectrometry (Bruker Daltonics, Billerica, MA, USA) [13]. The strains were grown in

88 McConkey agar plates (Oxoid, UK) at 37 °C for 18 h and stored in Trypticase Soy Broth (TSB)  
89 (Oxoid, UK) plus 15% glycerol at –80 °C until further analysis.

90

### 91 **Antibiotic susceptibility testing**

92 Meropenem (MEM), colistin (COL), and FDC *in vitro* susceptibility was evaluated in  
93 accordance with the EUCAST guidelines [14,15].

94 MEM trihydrate and COL sulfate salt powders (Merck/Sigma-Aldrich, Germany) were used  
95 to assess MICs by BMD in cation-adjusted Mueller Hinton II broth (CAMHB) (Becton, Dickinson  
96 and Company, MD, USA).

97 FDC disks containing 30 µg of antibiotic (Liofilchem, Italy) and FDC powder (SHIONOGI,  
98 Japan) were provided courtesy of SHIONOGI. Disk diffusion (DD) assays were performed on  
99 Mueller Hinton agar plates (MHA) (Oxoid, UK), while BMD MIC determination was performed on  
100 both CAMHB and iron-depleted cation-adjusted Mueller Hinton II broth (ID-CAMHB), the latter as  
101 indicated in the EUCAST guidelines, prepared using the Chelex® 100 resin (Bio-Rad Laboratories,  
102 CA, USA), as reported by Hackel et al. [11]

103 All experiments were performed in triplicate and the geometric mean was then calculated.

104 Due to the lack of actual breakpoints for FDC susceptibility in *A. baumannii*, strains with an  
105 inhibition zone with a diameter  $\geq 17$  mm were considered susceptible, whereas a diameter  $< 17$  mm  
106 was indicative of non-susceptible *A. baumannii* strains. Similarly, strains with a MIC value  $> 2$  were  
107 considered non-susceptible to FDC [14]. The minimal bactericidal concentration (MBC) was  
108 determined by plating the dilution representing the MIC as well as two less concentrated and five  
109 more concentrated dilutions from the same MIC assay on MHA plates and counting viable colonies.  
110 MBC was defined as the lowest concentration that demonstrated a reduction of 99.9% in CFU/ml  
111 compared to the starting inoculum. The MBC/MIC ratio was calculated from MIC assays performed  
112 in ID-CAMHB to see whether FDC had bactericidal or bacteriostatic activity on *A. baumannii* strains;  
113 a ratio of  $\leq 4$  was indicative of a bactericidal effect [16].

114

## 115 **Population analysis profile (PAP)**

116 Population analysis profile was performed and evaluated as described previously by Choby et  
117 al. and Band et al. [6,17] with minor modifications. Briefly, a well isolated colony from a McConkey  
118 agar plate was inoculated in 3 mL of tryptic soy broth (TSB) (Oxoid, UK) and incubated overnight at  
119 37 °C with shaking. The bacterial culture was serially diluted in sterile H<sub>2</sub>O from 10<sup>-1</sup> to 10<sup>-6</sup>, and  
120 50 µL of each dilution was plated in duplicate on MHA plates containing 0 (free), 1, 2, 4, 8, 16, or 32  
121 mg/L of FDC (limit of quantification 20 CFU/mL). Colonies were enumerated after 24 and 48 hours  
122 of growth at 37 °C, and only plates with 10 to 300 colonies were considered for subsequent analysis.  
123 Isolates were classified as resistant if the number of colonies that grew at the breakpoint concentration  
124 (i.e., 2 mg/L) was ≥50% of those growing on antibiotic-free plates. If an isolate was not resistant, it  
125 was classified as heteroresistant if the number of colonies that grew at the most concentrated dilution  
126 of FDC (i.e., 32 mg/L) was at least 1:10<sup>6</sup> of those growing on antibiotic-free plates. Isolates that were  
127 classified as neither resistant or heteroresistant were classified as susceptible. Student's t-tests of the  
128 ratios between the number of CFU/mL grown on FDC 2 mg/L MHA plates and 50% of the colonies  
129 grown on FDC-free plates were performed using GraphPad Prism version 8.0.0 for MacOS  
130 (GraphPad Software, California, USA) and only *p-values* ≤0.05 were considered statistically  
131 significant. The morphology of the bacteria exposed to different concentration of FDC was evaluated  
132 by optical microscopy.

133

## 134 **Cefiderocol non-susceptibility induction**

135 Starting from the PAP assay, one colony was recovered from a MHA plate with 32 mg/L of  
136 FDC and streaked on a fresh FDC 32 mg/L MHA plate and inoculated in 3 mL of ID-CAMHB with  
137 32 mg/L of FDC. If the strain was able to grow in the presence of such a high concentration of  
138 antibiotic, a disk diffusion test and MIC evaluation were performed as described above to evaluate a  
139 potential change in the susceptibility profile of the strain. The same tests were repeated after culturing

140 the previously induced strain on FDC-free MHA plates for 2 days to determine whether the acquired  
141 non-susceptibility to the drug was stable. The morphology of the induced bacteria, either exposed or  
142 not to the highest concentration of FDC, was evaluated by optical microscopy.

143

#### 144 **Evaluation of the synergistic activity of avibactam and sulbactam**

145 The synergistic activity of these two  $\beta$ -lactamase inhibitors (BLIs) in combination with FDC  
146 was investigated by disk diffusion test or e-test using disks of ceftazidime (CAZ) and  
147 ceftazidime/avibactam (CZA) (Oxoid, UK) - containing 4  $\mu$ g of avibactam - or strips of ampicillin  
148 (AMP) and ampicillin/sulbactam (SAM) (Liofilchem, Italy) - containing 4 mg/L of sulbactam -  
149 placed both on FDC-free MHA plates and MHA plates containing 32 mg/L or 1 mg/L of FDC  
150 previously inoculated with one FDC-non susceptible induced strain (FDC MIC >32 mg/L) or strains  
151 with a FDC MIC >1 mg/L, respectively. *A. baumannii* ATCC 17978 was used as FDC 1 mg/L activity  
152 control. The comparison between the inhibition obtained by CAZ and CZA or AMP and SAM in the  
153 plates with and without FDC allowed us to evaluate the efficacy of the BLIs.

154

## 155 **RESULTS**

156           The strains included in study are described in Tables 1a and 1b. All isolates were sequenced  
157 by NGS (data not shown) and belong to ST 2 (n.8 strains), ST 52 (n.1 strain), ST 77 (n.1 strain). All  
158 isolates contained several OXA gene alleles (Table 1a), including the acquired OXA<sub>23</sub> (6 out of 7  
159 clinical isolates). All ten strains had AmpC (ADC variants such as ADC2, ADC25, ADC30, ADC73).  
160 The analysis of the mutations in the septum formation penicillin binding protein 3 (PBP3 - proposed  
161 as the main FDC target), showed only a non-synonymous mutation in Abau2 leading to the A515V  
162 amino acid change, and two non-synonymous mutations in ACICU producing A346V and H370Y  
163 amino acid variations. Moreover, we found seven (ATCC 19606), ten (all the clinical strains) or 16  
164 (ACICU) synonymous mutations in the same gene (reference genome *Acinetobacter baumannii*  
165 ATCC 17978, GenBank code CP000521.1, locus tag A1S\_3204).

166

### 167 **MIC, MBC and *cidality***

168           Table 1a shows the MEM and COL MIC values together with the FDC *in vitro* susceptibility  
169 profile in terms of MIC, MBC and MBC/MIC ratio to determine drug *cidality*. In accordance with  
170 the EUCAST criteria for susceptibility categorization, all strains but *A. baumannii* ATCC 17978 were  
171 resistant to MEM, while only two strains (namely Abau3 and Abau4) were COL-resistant.

172           FDC DD results highlighted that two clinical *A. baumannii* strains and the three controls were  
173 susceptible to FDC, while four clinical strains were non-susceptible, with two strains showing  
174 colonies within the FDC inhibition zones, which in itself demonstrates the presence of  
175 subpopulations, as reported by Sherman et al. [18].

176           MIC assays were performed in triplicate in both CAMHB and ID-CAMHB, and their  
177 geometric means were compared with DD tests to evaluate concordance. In seven strains, inhibition  
178 zone and MIC values correlate, whereas two clinical strains (Abau3, Abau4) showed discordance  
179 between DD and MIC in ID-CAMHB and the laboratory-adapted ACICU strain displayed different  
180 susceptibility phenotypes when tested by DD and in CAMHB for MIC evaluation, respectively. Of



181 note, all discrepancies were observed when the inhibition zone was 17 mm (the susceptibility  
182 breakpoint) in size and the MIC values in ID-CAMHB were one dilution higher or lower than the  
183 suggested resistance breakpoint (2 mg/L).

184 The MBC/MIC ratios evaluated by the following standard criteria [16] showed a bactericidal  
185 activity for FDC in all strains but one (*A. baumannii* ATCC 19606).

186

### 187 **Population analysis profile (PAP)**

188 In addition to previous determinations, PAP analysis was performed for all of the study strains  
189 in order to determine the frequency of bacterial cells growing on agar supplemented with various  
190 concentrations of FDC. Results are reported in Table 1b and Figure S1. Eight out of ten strains were  
191 heteroresistant as the number of colonies growing at antibiotic concentrations up to 16 times the  
192 breakpoint (that is, not just at 2-4 times as stated in the guidelines) were at least  $1:10^6$  of those growing  
193 on antibiotic-free plates. Abau5 was considered resistant because the colonies growing in the presence  
194 of 2 mg/L of FDC outnumbered 50% of colonies growing on antibiotic-free plate, vice versa *A.*  
195 *baumannii* ATCC 17978 was considered fully susceptible (Figure S2). Moreover, all strains but *A.*  
196 *baumannii* ATCC 17978 grew on MHA plates with 32 mg/L of FDC in the form of very tiny colonies  
197 (Figure 1a), and microscopic examinations of these colonies revealed the presence of filamentous  
198 bacteria (Figure 1b). These colonies were slightly visible after 24 hours of incubation, becoming big  
199 enough to be enumerated after 48 hours. An internal control experiment revealed no differences in  
200 the colony growth on MHA plates with FDC previously incubated at 37 °C for 48 hours before  
201 inoculation and plates inoculated right after their preparation, suggesting FDC stability at 37 °C for  
202 at least 2 days. Small colonies immediately turned back to their original shape once the drug was  
203 removed (image not shown). These data confirm the caveat of usual standard laboratory testing to  
204 detect heteroresistance, very widespread in our isolates.

205

### 206 **Regrowth and stability of non-susceptible induced isolates**

207 During MBC experiments, 4 strains showed a regrowth of approximately  $10^3$  cells at the  
208 highest FDC concentration of 32 mg/L despite proving susceptible to FDC by DD testing and the  
209 drug demonstrating *cidal* activity (Table 2).

210 Among the strains showing regrowth after MIC and MBC assays, Abau3 was the only one  
211 able to grow after various passages in MHA plate and in ID-CAMHB containing 32 mg/L of FDC.  
212 As expected, the FDC MIC value of the strain picked up from the MHA plate containing FDC was  
213 significantly higher than the original MIC of Abau3, i.e., MIC >32mg/L vs MIC 4 mg/L.  
214 Nevertheless, non-susceptibility was lost after two passages of the induced Abau3 strain in antibiotic-  
215 free plates (Table 3). A DD test on induced Abau3 gave an inhibition zone of 6 mm, confirming its  
216 non-susceptible profile, while the same test performed on Abau3 that had lost induction yielded an  
217 inhibition zone of 18 mm, as typical for susceptible strains (Table 3).

218 Microscopic investigations of induced Abau3 showed no or very little differences in the  
219 bacterial cells grown in the presence or absence of FDC, with only a few filamentous bacteria in the  
220 former condition (Table 3).

221

### 222 **Effect of $\beta$ -lactamase inhibitors on ceftiderocol susceptibility restoration**

223 As our strains harbored multiple classes of  $\beta$ -lactamase resistance genes, the addition of BLIs  
224 to FDC could to some extent restore its activity. The inhibition zones of CAZ and CZA for the non-  
225 susceptible induced Abau3 strain grown on antibiotic-free MHA plates and plates with 32 mg/L of  
226 FDC are shown in Figure 2. The lack of inhibition around the disks containing CAZ and CZA on  
227 antibiotic-free MHA plates indicated that the strain was resistant to ceftazidime and that avibactam  
228 would not increase its efficacy against the resistant strain. Conversely, the emergence of an inhibition  
229 zone around the CZA disk, together with its absence around the CAZ disk, on MHA plates  
230 supplemented with FDC revealed that avibactam was able to restore FDC antimicrobial activity. SAM  
231 and AMP strips did not show any difference in plates with or without FDC, indicating a poor activity  
232 of sulbactam in restoring the efficacy of FDC in this induced isolate.

233 The same tests performed on the other strains with FDC MIC >1 mg/L (i.e., Abau1, Abau3,  
234 Abau5, Abau6, Abau7, and ACICU) revealed different activities for avibactam and sulbactam  
235 regardless of their FDC MIC values. Particularly, avibactam restored FDC activity for Abau3 and  
236 Abau7, while sulbactam restored FDC activity for the Abau3, Abau5, Abau6 and Abau7 strains  
237 (resistant to SAM with MIC values >256 mg/L).

238

## 239 **DISCUSSION**

240 Cefiderocol, a novel siderophore cephalosporin, gained great attention due to its peculiar  
241 mechanism of entry into cells (the so-called Trojan horse-like approach [4]) and undoubted activity  
242 against MDR organisms, including *A. baumannii* [3,19,20]. In this context and in parallel with the  
243 increased expectations of its use, difficulties emerged in terms of: i) defining the best method to be  
244 used for AST, resulting from the peculiar requirement for the drug to be assessed in ID-CAMHB in  
245 order to induce siderophore-mediated entry; and ii) some cases of clinical and microbiological failures  
246 reported in the literature, related to evoked heteroresistance to this drug [5,21].

247 From what is nowadays known, major gaps are still to be filled in all these fields.

248 Our study aimed to test cefiderocol susceptibility in some strains of *A. baumannii*, both  
249 clinical and reference strains, focusing initially on the conditions for susceptibility testing by the use  
250 of two different liquid media and the disk diffusion method to determine the level of reproducibility  
251 of each set of testing; further, we aimed to determine the *cidality* of the drug, followed by PAP  
252 analysis experiments, to evaluate the presence of resistant cell subpopulations as well as the activity  
253 of BLIs in restoring cefiderocol's antibacterial activity.

254 The *A. baumannii* strains included in the study belong to two different ST types and were  
255 MDR, including resistance to meropenem (9/10 of the sample) and, to a lesser extent, colistin (2/10  
256 of the sample). Resistome analysis by NGS demonstrated a plethora of OXA and ADC variants in  
257 their genomes. In these strains, FDC showed a different degree of susceptibility when a disk diffusion  
258 breakpoint  $\geq 17$  mm was used (5 strains were susceptible and 5 non-susceptible or heteroresistant due

259 to the presence of colonies within the inhibition zone). The geometric mean of the MIC values  
260 performed at least three times in CAMHB and ID-CAMHB correlate better with the disk diffusion  
261 results whenever the DD and MIC values were distant from their respective breakpoints (17 mm and  
262 2 mg/L, respectively); instead, every time those values coincided or were very close to the  
263 breakpoints, the rate of discordance between the two methods was higher. The same discordance can  
264 be found in the EUCAST MIC-zone diameter correlates for *A. baumannii* for strains with a DD  
265 diameter between 16 and 18 mm (Area of Technical Uncertainty, ATU) [15].

266         Considering the MBC/MIC ratio, even if FDC proved bactericidal in almost all isolates, *A.*  
267 *baumannii* seemed intrinsically prone to adapt to increased drug concentrations, showing a general  
268 ability (four out of ten strains) to survive at the highest drug concentration.

269         In particular, these subpopulations exhibited smaller colonies and a change in the shape of the  
270 microorganisms, from a coccobacillary form to filamentous cells. The regrowth capacity of several  
271 tiny colonies, as demonstrated at the highest concentrations of FDC, retested immediately after  
272 isolation and after two passages in antibiotic-free medium, was found to be unstable. Indeed, all  
273 colonies reverted to the original MIC value. The change in the shape of the microorganisms could be  
274 explained by the mechanism of inhibition of FDC, which binds PBP3 as the most important target of  
275 the drug, followed by PBP2 and 1 [22], as well as by the propensity of *A. baumannii* to change its  
276 colony morphology and cell shape in response to many stress factors [23]. However, the different  
277 resistance profiles in our strains seem to be not related to PBP3 integrity as there were no amino acid  
278 changes in 7 samples when compared to the fully susceptible ATCC 17978 strain and only one or  
279 two non-synonymous mutations in the remaining 2 isolates. To note, the H370Y amino acid change  
280 found in ACICU have been previously reported by Nordmann et al. arising in an *A. baumannii* strain  
281 following the treatment with FDC that resulted in the increase of the MIC value from 1 to 4 mg/L  
282 [24].

283         Regrowth at the highest concentration and its loss after as little as two passages without FDC  
284 confirm the adaptability of this species to the surrounding environment, responding to a myriad of

285 intra- and extra-cellular signals [25]. All these regulatory circuitries, widely represented in the  
286 genome of this microorganism, were evoked to explain the emergence of resistant cells expressing  
287 distinct and critical phenotypes - for example, becoming resistant - in order to survive and adapt to  
288 hostile situations.

289         The same phenomenon of regrowth at increased FDC concentrations in populations greater  
290 than  $1 \times 10^6$  CFU/ml was observed during population analysis profiling (PAP). Of the 10 strains tested,  
291 only one was frankly susceptible and one frankly resistant; all others could be defined as  
292 heteroresistant to the drug. Even in this case, tiny colonies and morphological changes were observed.  
293 In our experiments, very tiny colonies started to grow right after the first overnight incubation but  
294 were too small to be counted, and they continued to grow larger up to 48 hours of incubation to reach  
295 a size which allowed us to count and pick them up. Once again, our *A. baumannii*'s FDC susceptibility  
296 profile was inconsistent when analyzing PAP results. In fact, only the frankly resistant and the frankly  
297 susceptible strains were classified in the same way based on DD and MIC evaluations. Despite being  
298 quick and easy to perform, these latter methods are not suited to determine the presence of unstable  
299 heteroresistant subpopulations that could be the reason for some therapeutic failures with FDC and  
300 other antibiotics. These cases need to be further investigated by PAP to better classify *A. baumannii*  
301 resistance profile, as suggested by Band et al. for *Enterobacterales* [17].

302         Luckily, the combination of FDC with a  $\beta$ -lactamase inhibitor – such as avibactam or  
303 sulbactam - seems to restore FDC antibacterial activity even at concentrations several times lower  
304 than its MIC, as already shown by other authors [26]. It remains unclear why, in some strains, the  
305 synergistic activity is provided by both the tested BLIs while, in other strains, only one inhibitor  
306 restored cefiderocol's activity. Furthermore, no correlation is evident between FDC MIC values and  
307 the activity of BLIs or the presence of different *blaOXA* genes.

308

309 **CONCLUSIONS**

310 The need for new antimicrobial agents to address the treat of antibiotic resistance is recognized  
311 worldwide and, in this scenario, new molecules as cefiderocol are a breath of fresh air.  
312 Notwithstanding, any new antibiotics need to be thoroughly investigated in order to characterize their  
313 strengths and weakness and, perhaps more importantly, to unveil antibiotic/bacterial species  
314 interconnections.

315 Cefiderocol demonstrated promising activity against Gram-negative bacteria, including those  
316 referred to as ESKAPE, for which the therapeutic options are limited, such as *A. baumannii*. By  
317 investigating the resistance profile of some clinical and laboratory-adapted *A. baumannii* strains to  
318 cefiderocol, we found that these strains are not easily classified into the commonly used categories  
319 of susceptibility - especially strains with susceptibility levels very close to the proposed resistance  
320 breakpoints – due to a high prevalence of heteroresistant subpopulations. Heteroresistance in *A.*  
321 *baumannii* seems to be common as a stress response mechanism, but - luckily - it is apparently an  
322 unstable and transient trait. Our results, in accordance with recently published clinical observations  
323 [12,27], go in the direction of combination therapy when FDC is used to treat severe *A. bauamanni*  
324 infections.

325

326 **Funding:** The manuscript was partially supported by a research grant PRIN2020 from the Ministry  
327 of Research (MIUR) Italy.

328 **Acknowledgments:** We would like to thank Shionogi & Co., Ltd for supplying us Cefiderocol  
329 powder, disks and strips. The authors wish to thank Prof. Paolo Visca for providing ACICU strain.  
330 We also wish to thank PharmaTranslated (<http://www.pharmatranslated.com/>) and in particular to  
331 Silvia Montanari for the language revision.

332 **Author contribution:** Stefania Stefani (SS) and Stefano Stracquadanio (SStr) conceptualized the  
333 work and wrote the manuscript; Andrea Mar provided clinical isolates; SStr, CB AM and Alessia  
334 Mirabile (AMir) performed the experiments; DB, GFP, DAB and PGB made genome sequencing and

335 mutational analysis; SS, SStr and CB analyzed the data, SS supervised and acquired the funds. All  
336 authors have read and agreed to the published version of the manuscript.

337

338

## 339 **References**

- 340 1. Nicoloff H, Hjort K, Levin BR, Andersson DI. 2019. The high prevalence of antibiotic  
341 heteroresistance in pathogenic bacteria is mainly caused by gene amplification. *Nat*  
342 *Microbiol.* 4(3):504-514. doi: 10.1038/s41564-018-0342-0.
- 343 2. Cafiso V, Stracquadanio S, Dovere V, Lo Verde F, Zega A, Pigola G, Barnini S, Ghelardi E,  
344 Stefani S. 2021. Colistin Resistance Onset Strategies and Genomic Mosaicism in Clinical  
345 *Acinetobacter baumannii* Lineages. *Pathogens.* 20;10(11):1516. doi:  
346 10.3390/pathogens10111516.
- 347 3. Stracquadanio S, Torti E, Longshaw C, Henriksen AS, Stefani S. 2021. In vitro activity of  
348 cefiderocol and comparators against isolates of Gram-negative pathogens from a range of  
349 infection sources: SIDERO-WT-2014-2018 studies in Italy. *J Glob Antimicrob Resist.*  
350 25:390-398. doi: 10.1016/j.jgar.2021.04.019.
- 351 4. Simner PJ, Patel R. 2020. Cefiderocol Antimicrobial Susceptibility Testing Considerations:  
352 the Achilles' Heel of the Trojan Horse? *J Clin Microbiol.* 59(1):e00951-20. Published 2020  
353 Dec 17. doi:10.1128/JCM.00951-20.
- 354 5. Bassetti M, Echols R, Matsunaga Y, Ariyasu M, Doi Y, Ferrer R, Lodise TP, Naas T, Niki Y,  
355 Paterson DL, Portsmouth S, Torre-Cisneros J, Toyozumi K, Wunderink RG, Nagata TD.  
356 2021. Efficacy and safety of cefiderocol or best available therapy for the treatment of serious  
357 infections caused by carbapenem-resistant Gram-negative bacteria (CREDIBLE-CR): a  
358 randomised, open-label, multicentre, pathogen-focused, descriptive, phase 3 trial. *Lancet*  
359 *Infect Dis.* 21(2):226-240. doi: 10.1016/S1473-3099(20)30796-9.

- 360 6. Choby JE, Ozturk T, Satola SW, Jacob JT, Weiss DS. 2021. Widespread cefiderocol  
361 heteroresistance in carbapenem-resistant Gram-negative pathogens. *Lancet Infect Dis.*  
362 21(5):597-598. doi: 10.1016/S1473-3099(21)00194-8.
- 363 7. Li J, Rayner CR, Nation RL, Owen RJ, Spelman D, Tan KE, Liolios L. 2006.  
364 Heteroresistance to colistin in multidrug-resistant *Acinetobacter baumannii*. *Antimicrob*  
365 *Agents Chemother.* 2006 Sep;50(9):2946-50. doi: 10.1128/AAC.00103-06.
- 366 8. Anderson SE, Sherman EX, Weiss DS, Rather PN. 2018. Aminoglycoside Heteroresistance  
367 in *Acinetobacter baumannii* AB5075. *mSphere.* 15;3(4):e00271-18. doi:  
368 10.1128/mSphere.00271-18.
- 369 9. Pournaras S, Ikonomidis A, Markogiannakis A, Maniatis AN, Tsakris A. 2005.  
370 Heteroresistance to carbapenems in *Acinetobacter baumannii*. *J Antimicrob Chemother.*  
371 55(6):1055-6. doi: 10.1093/jac/dki115.
- 372 10. Jo J, Ko KS. 2021. Tigecycline Heteroresistance and Resistance Mechanism in Clinical  
373 Isolates of *Acinetobacter baumannii*. *Microbiol Spectr.* 31;9(2):e0101021. doi:  
374 10.1128/Spectrum.01010-21.
- 375 11. Hackel MA, Tsuji M, Yamano Y, Echols R, Karlowsky JA, Sahm DF. 2019. Reproducibility  
376 of broth microdilution MICs for the novel siderophore cephalosporin, cefiderocol, determined  
377 using iron-depleted cation-adjusted Mueller-Hinton broth. *Diagn Microbiol Infect Dis.*  
378 94(4):321-325. doi: 10.1016/j.diagmicrobio.2019.03.003.
- 379 12. Karaba SM, Hirsch EB, Heil EL. In a Pinch: Cefiderocol for CRAB Infections. 2022.  
380 *Antimicrob Agents Chemother.* 11:e0006522. doi: 10.1128/aac.00065-22.
- 381 13. Overview Microflex Series—Highest Performance Bench-Top MALDI-TOF, MS  
382 Bruker.com. Available online: [https://www.bruker.com/products/mass-spectrometry-and-](https://www.bruker.com/products/mass-spectrometry-and-separations/maldi-toftof/microflex/overview.html)  
383 [separations/maldi-toftof/microflex/overview.html](https://www.bruker.com/products/mass-spectrometry-and-separations/maldi-toftof/microflex/overview.html) (accessed on 9 November 2021).
- 384 14. "The European Committee on Antimicrobial Susceptibility Testing. Breakpoint tables for  
385 interpretation of MICs and zone diameters, version 12.0, January 2022".



- 386 15. "The European Committee on Antimicrobial Susceptibility Testing. Breakpoint for  
387 cefiderocol. Addendum (May 2020) to EUCAST breakpoint tables v. 10.0. Breakpoints to be  
388 included in EUCAST breakpoint tables v. 11.0, January 2021".
- 389 16. Pankey GA, Sabath LD. 2004. Clinical relevance of bacteriostatic versus bactericidal  
390 mechanisms of action in the treatment of Gram-positive bacterial infections. *Clin Infect Dis.*  
391 15;38(6):864-70. doi: 10.1086/381972.
- 392 17. Band VI, Hufnagel DA, Jaggavarapu S, Sherman EX, Wozniak JE, Satola SW, Farley MM,  
393 Jacob JT, Burd EM, Weiss DS. 2019. Antibiotic combinations that exploit heteroresistance to  
394 multiple drugs effectively control infection. *Nat Microbiol.* 4(10):1627-1635. doi:  
395 10.1038/s41564-019-0480-z.
- 396 18. Sherman EX, Wozniak JE, Weiss DS. 2019. Methods to Evaluate Colistin Heteroresistance  
397 in *Acinetobacter baumannii*. *Methods Mol Biol.* 1946:39-50. doi: 10.1007/978-1-4939-9118-  
398 1\_4.
- 399 19. Hackel MA, Tsuji M, Yamano Y, Echols R, Karlowsky JA, Sahm DF. 2017. In Vitro Activity  
400 of the Siderophore Cephalosporin, Cefiderocol, against a Recent Collection of Clinically  
401 Relevant Gram-Negative Bacilli from North America and Europe, Including Carbapenem-  
402 Nonsusceptible Isolates (SIDERO-WT-2014 Study). *Antimicrob Agents Chemother.*  
403 24;61(9):e00093-17. doi: 10.1128/AAC.00093-17.
- 404 20. Hackel MA, Tsuji M, Yamano Y, Echols R, Karlowsky JA, Sahm DF. 2018. In Vitro Activity  
405 of the Siderophore Cephalosporin, Cefiderocol, against Carbapenem-Nonsusceptible and  
406 Multidrug-Resistant Isolates of Gram-Negative Bacilli Collected Worldwide in 2014 to 2016.  
407 *Antimicrob Agents Chemother.* 25;62(2):e01968-17. doi: 10.1128/AAC.01968-17.
- 408 21. Falcone M, Tiseo G, Leonildi A, Della Sala L, Vecchione A, Barnini S, Farcomeni A,  
409 Menichetti F. 2022. Cefiderocol- Compared to Colistin-Based Regimens for the Treatment of  
410 Severe Infections Caused by Carbapenem-Resistant *Acinetobacter baumannii*. *Antimicrob*  
411 *Agents Chemother.* 21:e0214221. doi: 10.1128/aac.02142-21.

- 412 22. Malik S, Kaminski M, Landman D, Quale J. 2020. Cefiderocol Resistance in *Acinetobacter*  
413 *baumannii*: Roles of  $\beta$ -Lactamases, Siderophore Receptors, and Penicillin Binding Protein 3.  
414 Antimicrob Agents Chemother. 64(11):e01221-20. doi: 10.1128/AAC.01221-20.
- 415 23. Tipton KA, Dimitrova D, Rather PN. 2015. Phase-Variable Control of Multiple Phenotypes  
416 in *Acinetobacter baumannii* Strain AB5075. J Bacteriol. 197(15):2593-2599.  
417 doi:10.1128/JB.00188-15.
- 418 24. Nordmann P, Shields RK, Doi Y, Takemura M, Echols R, Matsunaga Y, Yamano Y. 2022.  
419 Mechanisms of Reduced Susceptibility to Cefiderocol Among Isolates from the CREDIBLE-  
420 CR and APEKS-NP Clinical Trials. Microb Drug Resist. 28(4):398-407. doi:  
421 10.1089/mdr.2021.0180.
- 422 25. Wood CR, Mack LE, Actis LA. 2018. An Update on the *Acinetobacter baumannii* Regulatory  
423 Circuitry. Trends Microbiol.26(7):560-562. doi:10.1016/j.tim.2018.05.005.
- 424 26. Poirel L, Sadek M, Nordmann P. 2021. Contribution of PER-Type and NDM-Type  $\beta$ -  
425 Lactamases to Cefiderocol Resistance in *Acinetobacter baumannii*. Antimicrob Agents  
426 Chemother. 65(10):e0087721. doi:10.1128/AAC.00877-21.
- 427 27. Tamma PD, Aitken SL, Bonomo RA, Mathers AJ, van Duin D, Clancy CJ. 2021. Infectious  
428 Diseases Society of America Guidance on the Treatment of AmpC  $\beta$ -lactamase-Producing  
429 *Enterobacterales*, Carbapenem-Resistant *Acinetobacter baumannii*, and *Stenotrophomonas*  
430 *maltophilia* Infections. Clin Infect Dis. 5:ciab1013. doi: 10.1093/cid/ciab1013.

431 **Table 1. Sequence type,  $\beta$ -lactamase genes and antibiotic resistance profile of the study sample.**

| a)               |    | Geometric mean $^n\sqrt{(x_1 \cdot x_2 \cdot x_3 \dots x_n)}$ |                           |         |       |          |                      |             |             |             |             | b)                                  |                                      |                     |
|------------------|----|---------------------------------------------------------------|---------------------------|---------|-------|----------|----------------------|-------------|-------------|-------------|-------------|-------------------------------------|--------------------------------------|---------------------|
| Genomic analysis |    | MIC mg/L                                                      |                           | MH Agar |       | CAMHB    |                      | ID-CAMHB    |             | PAP         |             |                                     |                                      |                     |
| Strain           | ST | <i>blaOxa<sub>n</sub></i>                                     | <i>blaADC<sub>n</sub></i> | MEM     | COL   | DD<br>mm | S/HR/NS <sup>‡</sup> | MIC<br>mg/L | MIC<br>mg/L | MBC<br>mg/L | MBC/<br>MIC | CFU/mL<br>2mg·L <sup>-1</sup> /Free | CFU/mL<br>32mg·L <sup>-1</sup> /Free | S/HR/R <sup>†</sup> |
| Abau1            | 2  | Oxa <sub>23,66,82,115,174,175,177,201</sub>                   | Adc <sub>25</sub>         | 64 R    | 1 S   | 12       | NS                   | 4           | 8           | 16          | 2           | >50%                                | >1/10 <sup>6</sup>                   | HR                  |
| Abau2            | 2  | Oxa <sub>23,66</sub>                                          | Adc <sub>73</sub>         | 64 R    | 2 S   | 24       | S                    | 1           | 0.5         | 2           | 4           | <50%                                | >1/10 <sup>6</sup>                   | HR                  |
| Abau3            | 2  | Oxa <sub>23,66,82,115,174,175,177,201</sub>                   | Adc <sub>25</sub>         | 64 R    | >64 R | 17       | S                    | 1           | 4           | 8           | 2           | >50%                                | >1/10 <sup>6</sup>                   | HR                  |
| Abau4            | 52 | Oxa <sub>66,72,82,897</sub>                                   | Adc <sub>30</sub>         | >64 R   | 8 R   | 16       | NS                   | 8           | 1           | 2           | 2           | >50%                                | >1/10 <sup>6</sup>                   | HR                  |
| Abau5            | 2  | Oxa <sub>23,66,82,115,174,175,177,201</sub>                   | Adc <sub>25</sub>         | >64 R   | 2 S   | 15 i.c.  | NS/HR                | 4           | 4           | 4           | 1           | >50%*                               | >1/10 <sup>6</sup>                   | R                   |
| Abau6            | 2  | Oxa <sub>23,66,82,115,174,175,177,201</sub>                   | Adc <sub>25</sub>         | >64 R   | 1 S   | 15 i.c.  | NS/HR                | 8           | 4           | 4           | 1           | >50%                                | >1/10 <sup>6</sup>                   | HR                  |
| Abau7            | 2  | Oxa <sub>23,66,82,115,174,175,177,201</sub>                   | Adc <sub>25</sub>         | >64 R   | 2 S   | 15       | NS                   | 8           | 16          | 32          | 2           | >50%                                | >1/10 <sup>6</sup>                   | HR                  |
| ACICU            | 2  | Oxa <sub>20,66</sub>                                          | Adc <sub>25</sub>         | 64 R    | 1 S   | 17       | S                    | 8           | 2           | 8           | 4           | >50%                                | >1/10 <sup>6</sup>                   | HR                  |
| ATCC 19606       | 2  | Oxa <sub>98</sub>                                             | Adc <sub>2</sub>          | 16 R    | 1 S   | 26       | S                    | 0.12        | 0.06        | 0.5         | 8           | <50%*                               | >1/10 <sup>6</sup>                   | HR                  |
| ATCC 17978       | 77 | Oxa <sub>95</sub>                                             | Adc <sub>25</sub>         | 1 S     | 1 S   | 22       | S                    | 0.25        | 0.06        | 0.25        | 4           | <50%*                               | <1/10 <sup>6</sup>                   | S                   |

432 <sup>‡</sup>characterized as susceptible or non-susceptible in accordance with the EUCAST breakpoints for cefiderocol and AST: a zone diameter  $\geq 17$  mm is typical for isolates with MIC values  $\leq 2$  mg/L

433 (*Enterobacterales*, *P. aeruginosa*, and PK/PD breakpoint) [14]; the presence of colonies within a zone of clearing indicates a possible heteroresistance phenotype [17]

434 <sup>†</sup>characterized as susceptible, heteroresistant or resistant following the published protocol [6,16]

435 \* *p*-value  $\leq 0.05$  (Student's t-test)

436 i.c.: colonies within the zone of clearing

437 S: susceptible; HR: heteroresistant; NS: non-susceptible; R: resistant

438 MEM: meropenem; COL: colistin

439 **Table 2. Regrowth from MBC/MIC assays.**

| Strain     | FDC mg/L |       |      |     |         |         |      |    |       |       |
|------------|----------|-------|------|-----|---------|---------|------|----|-------|-------|
|            | 0.06     | 0.125 | 0.25 | 0.5 | 1       | 2       | 4    | 8  | 16    | 32    |
| Abau1      | un       | un    | un   | un  | un      | un      | un   | un | 90    | 0     |
| Abau2      | un       | un    | un   | un  | un (sc) | un (sc) | 0    | 0  | 0     | 0     |
| Abau3      | un       | un    | un   | un  | un      | un      | un   | 0  | 0     | 3000* |
| Abau4      | un       | un    | un   | un  | un      | 0       | 0    | 0  | 0     | 0     |
| Abau5      | un       | un    | un   | un  | un      | un      | 100* | 0  | 1000* | un    |
| Abau6      | un       | un    | un   | un  | un      | un      | 0    | 0  | 0     | 0     |
| Abau7      | un       | un    | un   | un  | un      | un      | un   | un | un    | 0     |
| ACICU      | un       | un    | un   | un  | un      | un      | un   | 0  | 0     | 1800* |
| ATCC 19606 | un       | un    | 340  | 230 | 0       | 0       | 0    | 0  | un    | 9400* |
| ATCC 17978 | un       | un    | 0    | 0   | 0       | 0       | 0    | 0  | 0     | 0     |

440 \*expressed as CFU/mL

441 un: uncountable

442 sc: small colonies

443 edged squares indicate MIC values

444

445 **Table 3. Induction and maintenance of cefiderocol non-susceptibility.**

| Strain                                                             | MH Agar |                   | ID-CAMHB |
|--------------------------------------------------------------------|---------|-------------------|----------|
|                                                                    | DD mm   | S/NS <sup>‡</sup> | MIC mg/L |
| Abau3 post-induction with 32 mg/L<br>from a 32 mg/L FDC agar plate | 6       | S                 | >32      |
| Abau3 post-induction with 32 mg/L<br>from a FDC-free agar plate    | 18      | NS                | 2        |

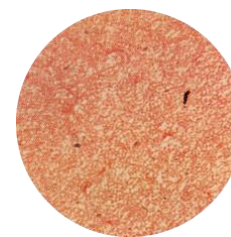

32 mg/L induced Abau3  
from a 32 mg/L FDC agar  
plate

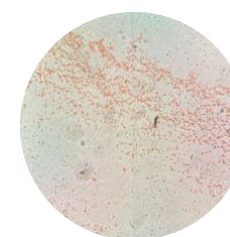

32 mg/L induced Abau3  
from a FDC-free agar  
plate

446 <sup>‡</sup>characterized as susceptible or non-susceptible in accordance with the EUCAST breakpoints for cefiderocol and AST: a zone diameter  $\geq 17$  mm is typical for isolates with MIC values  $\leq 2$  mg/L

447 (*Enterobacterales*, *P. aeruginosa*, and PK/PD breakpoint) [14]

448 i.c.: colonies within the zone of clearing

449 S: susceptible; NS: non-susceptible

450

451

452

453

454

455

456

457 **Figure 1. Representative model of small colonies growing and microscopic shape of non-susceptible or heteroresistant strains of *A.***

458 ***baumannii* at cefiderocol concentration higher than their MIC (ACICU – MIC: 2mg/L).**

459

460 **Figure 2. Effect of avibactam on cefiderocol susceptibility regain.**

- 1 **Figure 1. Representative model of small colonies growing and microscopic shape of non-susceptible or heteroresistant strains of *A. baumannii* at cefiderocol concentration higher than their MIC (ACICU – MIC: 2mg/L).**
- 2 ***baumannii* at cefiderocol concentration higher than their MIC (ACICU – MIC: 2mg/L).**

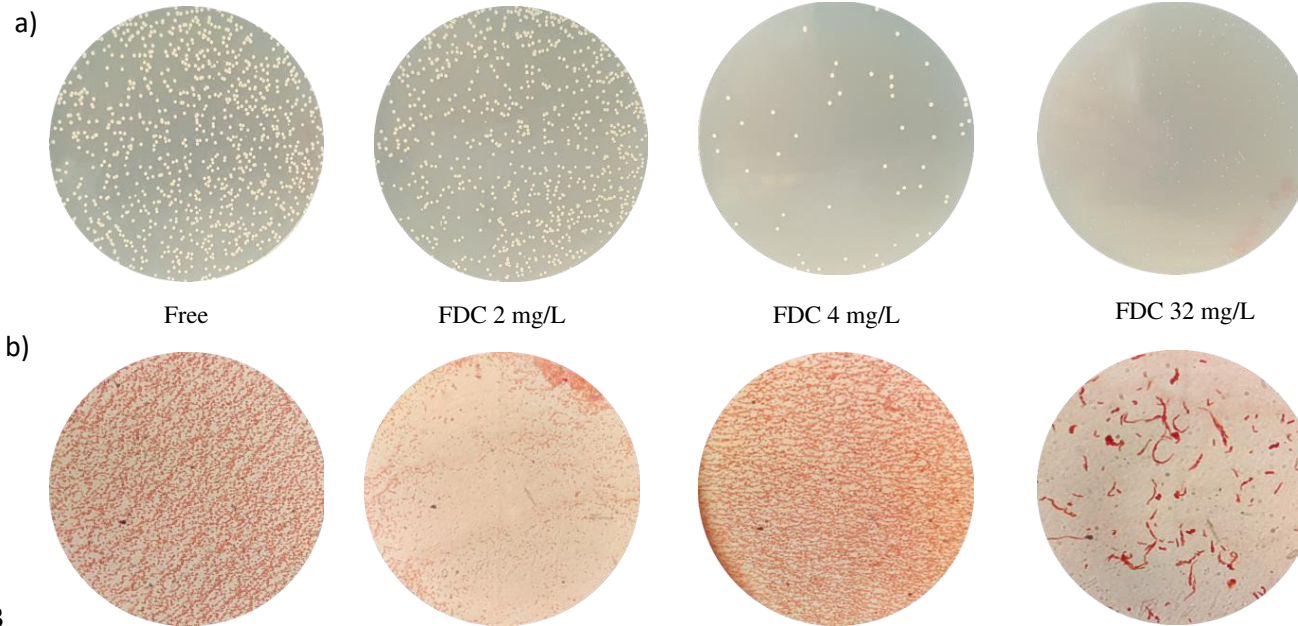

3

4

**Figure 2. Effect of avibactam on cefiderocol susceptibility regain.**

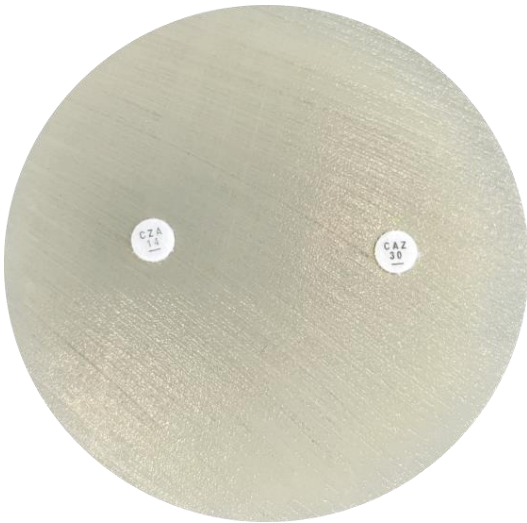

Induced Abau3 from 32mg/L cefiderocol  
agar plate on cefiderocol free  
Mueller Hinton agar

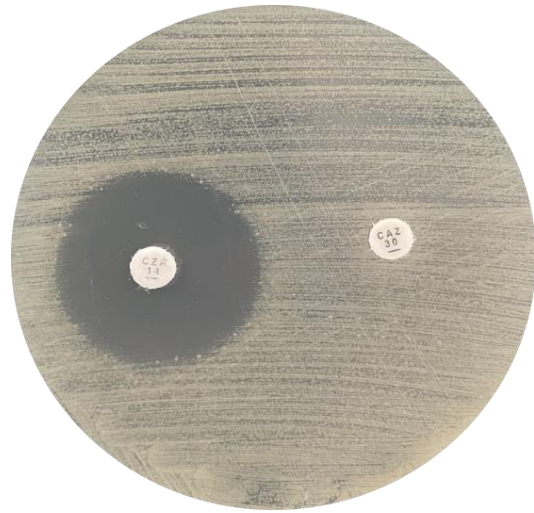

Induced Abau3 from 32mg/L cefiderocol  
agar plate on Mueller Hinton agar with  
32 mg/L of cefiderocol

CZA: ceftazidime/avibactam

CAZ: ceftazidime
